# Supplementary material
Source: MDPI journal article supplement (https://www.mdpi.com/1999-4907/8/1/5)
Supplement: s1 [file s1]

## Sheet: Meta File
Influence of forest harvest on nitrate concentration in temperate streams - a meta-analysis
Appendix Table S2 - Data
Anne-Christine Mupepele, Carsten F. Dormann
Abbreviations used in TableS1
MC	mean annual nitrate concentration of the control site
MT	mean annual nitrate concentration of the harvested site
SC	standard deviation of the control site
ST	standard deviation of the harvested site
NC	sample size, number of nitrate measurements in the control site
NC	sample size, number of nitrate measurements in the harvested site

## Sheet: TableS1_R.csv
Site_Number	Reference	Country	Catchment	Forest_Harvest	Forest_Composition	Time_after_harvest	Altitude	Catchment_Size	Forest_Age	Mean_Annual_Temperature	Mean_Annual_Precipitation	Harvest_Year	Post-harvest	Tree_Part_Removed	Level_of_Evidence	Study_design	Quality_Score	Effect_Size	Variance_of_Effect_Size	MC	MT	SC	ST	NC	NT
56.1	Graynoth 1979	New Zealand	Golden Downs State Forest, Nelson	patchcut-high	Mix	2	500	2031	40	10.1	1343	1974			LoE4a	control-impact	41.1765	0.776064	0.130449	0.05	0.124118	0.05	0.120315	16	17
56.2	Graynoth 1979	New Zealand	Golden Downs State Forest, Nelson	clearcut	Mix	2	500	185	40	10.1	1343	1972			LoE4a	control-impact	41.1765	2.32904	0.203512	0.05	0.361176	0.05	0.174853	16	17
56.3	Graynoth 1979	New Zealand	Golden Downs State Forest, Nelson	clearcut	Dec	1	500	47	40	10.1	1343	1973			LoE4a	control-impact	41.1765	5.86497	0.642504	0.05	0.604706	0.05	0.11896	16	17
90	Oda et al. 2011	Japan	Fukuroyamasawa Experimental Watershed	clearcut	Con	1	180	1.1	70	14	2230	1999	replanted	stem-only	LoE3b	BACI	58.8235	1.00952	0.0834927	3081.92	7512.81	2245.12	5045.2	20	40
90	Oda et al. 2011	Japan	Fukuroyamasawa Experimental Watershed	clearcut	Con	2	180	1.1	70	14	2230	1999	replanted	stem-only	LoE3b	BACI	58.8235	2.14593	0.110146	2435.18	7442.03	1924.14	2492.33	22	38
90	Oda et al. 2011	Japan	Fukuroyamasawa Experimental Watershed	clearcut	Con	3	180	1.1	70	14	2230	1999	replanted	stem-only	LoE3b	BACI	58.8235	1.85561	0.0946352	1095.86	3711.03	825.746	1642.38	24	39
90	Oda et al. 2011	Japan	Fukuroyamasawa Experimental Watershed	clearcut	Con	4	180	1.1	70	14	2230	1999	replanted	stem-only	LoE3b	BACI	58.8235	2.46504	0.190098	899.179	3269.1	594.716	1106.61	15	23
90	Oda et al. 2011	Japan	Fukuroyamasawa Experimental Watershed	clearcut	Con	5	180	1.1	70	14	2230	1999	replanted	stem-only	LoE3b	BACI	58.8235	0.445773	0.106651	1192.89	1592.32	994.338	793.376	16	24
90	Oda et al. 2011	Japan	Fukuroyamasawa Experimental Watershed	clearcut	Con	6	180	1.1	70	14	2230	1999	replanted	stem-only	LoE3b	BACI	58.8235	-0.967864	0.19857	1271.61	550.071	1105.61	482.104	8	18
90	Oda et al. 2011	Japan	Fukuroyamasawa Experimental Watershed	clearcut	Con	7	180	1.1	70	14	2230	1999	replanted	stem-only	LoE3b	BACI	58.8235	-1.02772	0.240422	1276.74	504.658	1251.6	489.058	6	19
90	Oda et al. 2011	Japan	Fukuroyamasawa Experimental Watershed	clearcut	Con	8	180	1.1	70	14	2230	1999	replanted	stem-only	LoE3b	BACI	58.8235	-0.41845	0.262803	834.379	568.611	1001.33	464.669	5	17
266.1	Clinton 2011	USA	Coweeta	selective-low	Mix	1	900	229	60	12.6	1800	2006	fertilized and grass seeds		LoE4a	BACI	40	0.366934	0.0242949	334.039	399.127	93.8568	237.528	89	79
266.1	Clinton 2011	USA	Coweeta	selective-low	Mix	2	900	229	60	12.6	1800	2006	fertilized and grass seeds		LoE4a	BACI	40	0.366934	0.0242949	334.039	399.127	93.8568	237.528	89	79
266.2	Clinton 2011	USA	Coweeta	selective-low	Mix	1	900	495	60	12.6	1800	2005	fertilized and grass seeds		LoE4a	BACI	40	-0.71987	0.0236644	334.039	262.75	93.8568	103.051	89	91
266.2	Clinton 2011	USA	Coweeta	selective-low	Mix	2	900	495	60	12.6	1800	2005	fertilized and grass seeds		LoE4a	BACI	40	-0.71987	0.0236644	334.039	262.75	93.8568	103.051	89	91
266.2	Clinton 2011	USA	Coweeta	selective-low	Mix	3	900	495	60	12.6	1800	2005	fertilized and grass seeds		LoE4a	BACI	40	-0.71987	0.0236644	334.039	262.75	93.8568	103.051	89	91
266.3	Clinton 2011	USA	Coweeta	selective-low	Mix	1	900	425	60	12.6	1800	2006	fertilized and grass seeds		LoE4b	BACI	33.3333	-2.87467	0.0481849	334.039	104.662	93.8568	59.3758	89	80
266.3	Clinton 2011	USA	Coweeta	selective-low	Mix	2	900	425	60	12.6	1800	2006	fertilized and grass seeds		LoE4b	BACI	33.3333	-2.87467	0.0481849	334.039	104.662	93.8568	59.3758	89	80
337.1	Cummins & Farrell 2003	Ireland	Cloosh	patchcut-low	Con	1	63	115	30	10.9	1156	2000	fertilized		LoE3b	BACI	52.9412	0.561725	0.0691245	0	97.6744	0	212.119	23	43
337.2	Cummins & Farrell 2003	Ireland	Cloosh	clearcut	Con	1	63	1	30	10.9	1156	2000	replanted		LoE3b	before-after	60	-0.151664	0.0277024	3.18471	0	23.8058	0	157	47
337.3	Cummins & Farrell 2003	Ireland	Cloosh	clearcut	Con	1	63	1	30	10.9	1156	1999	replanted		LoE3b	before-after	60	1.43704	0.0326574	2.15827	370	18.911	497.032	139	50
409	Fukuzawa et al. 2006	Japan	Teshio Experimental Forest	clearcut	Mix	1	270	8	25	5.6	1170	1999	replanted	stem-only	LoE3b	before-after	60	0.25679	0.131825	51.7359	94.3966	54.2188	190.141	11	25
461.1	Reynolds et al. 1992	UK	Kershope	clearcut	Con	1	225	2	35	10.5	1480	1983		whole tree	LoE3a	control-impact	70.5882	0.723861	0.0321723	6653.93	12506	3515.25	9412.48	48	104
461.1	Reynolds et al. 1992	UK	Kershope	clearcut	Con	2	225	2	35	10.5	1480	1983		whole tree	LoE3a	control-impact	70.5882	1.24368	0.0348411	5858.84	13128	3379.58	6854.64	54	91
461.1	Reynolds et al. 1992	UK	Kershope	clearcut	Con	3	225	2	35	10.5	1480	1983		whole tree	LoE3a	control-impact	70.5882	1.02696	0.0307094	6349.29	11963.5	4176.95	6157.05	62	90
461.1	Reynolds et al. 1992	UK	Kershope	clearcut	Con	4	225	2	35	10.5	1480	1983		whole tree	LoE3a	control-impact	70.5882	0.879382	0.0277309	4837.56	7872.02	3030.1	3698.48	68	94
461.2	Reynolds et al. 1992	UK	Kershope	clearcut	Con	1	225	2	35	10.5	1480	1983		whole tree	LoE3b	control-impact	58.8235	1.00165	0.0426846	5300.3	12833.8	3829.09	10182.8	57	49
461.2	Reynolds et al. 1992	UK	Kershope	clearcut	Con	2	225	2	35	10.5	1480	1983		whole tree	LoE3b	control-impact	58.8235	1.51138	0.0529003	6231.16	17296.6	3369.44	10188.7	54	44
461.2	Reynolds et al. 1992	UK	Kershope	clearcut	Con	3	225	2	35	10.5	1480	1983		whole tree	LoE3b	control-impact	58.8235	1.14189	0.0462522	5698.1	12277.4	3785.81	7649.56	60	43
461.2	Reynolds et al. 1992	UK	Kershope	clearcut	Con	4	225	2	35	10.5	1480	1983		whole tree	LoE3b	control-impact	58.8235	0.814234	0.0396209	5706.04	9552.52	3565.52	5911.94	65	47
548	Silsbee & Larson 1983	USA	Great Smoky Mountains National Park	clearcut	Mix	53	1162	239	50	12.7	1397	1926			LoE4b	control-impact	25	-3.01027	0.341491	2084.62	441.667	697.431	227.47	13	12
548	Silsbee & Larson 1983	USA	Great Smoky Mountains National Park	clearcut	Mix	54	1162	239	50	12.7	1397	1926			LoE4b	control-impact	25	-3.3534	0.400944	3116.67	741.667	865.325	431.611	12	12
771.1	Murray et al. 2000	USA	Hoh river valley	clearcut	Con	15	330	235	600	10	3333	1996	replanted		LoE4b	control-impact	35.2941	0.223354	0.154806	411.763	586.433	517.174	937.827	13	13
771.1	Murray et al. 2000	USA	Hoh river valley	clearcut	Con	16	330	235	600	10	3333	1996	replanted		LoE4b	control-impact	35.2941	-0.457365	0.171025	309.24	252.794	80.3705	148.106	12	12
771.2	Murray et al. 2000	USA	Hoh river valley	clearcut	Con	9	350	263	600	10	3333	1996	replanted		LoE4b	control-impact	35.2941	0.195439	0.154581	411.763	571.817	517.174	995.172	13	13
771.2	Murray et al. 2000	USA	Hoh river valley	clearcut	Con	10	350	263	600	10	3333	1996	replanted		LoE4b	control-impact	35.2941	-0.537384	0.172683	309.24	251.317	80.3705	123.286	12	12
773.1	Arthur et al. 1998	USA	Kentucky, Robinson forest	clearcut	Dec	1	365	10	70	12	1175	1983			LoE3b	BACI	58.8235	1.49324	0.03996	1300	4700	717.491	3119.4	64	64
773.1	Arthur et al. 1998	USA	Kentucky, Robinson forest	clearcut	Dec	2	365	10	70	12	1175	1983			LoE3b	BACI	58.8235	1.43727	0.048393	1500	2900	825.072	1090.41	52	52
773.1	Arthur et al. 1998	USA	Kentucky, Robinson forest	clearcut	Dec	3	365	10	70	12	1175	1983			LoE3b	BACI	58.8235	2.03926	0.0584546	600	1900	345.059	825.695	52	52
773.1	Arthur et al. 1998	USA	Kentucky, Robinson forest	clearcut	Dec	4	365	10	70	12	1175	1983			LoE3b	BACI	58.8235	-0.301681	0.0388991	1400	1200	802.043	472.042	52	52
773.1	Arthur et al. 1998	USA	Kentucky, Robinson forest	clearcut	Dec	5	365	10	70	12	1175	1983			LoE3b	BACI	58.8235	0.509436	0.0397093	800	1000	478.767	272.962	52	52
773.1	Arthur et al. 1998	USA	Kentucky, Robinson forest	clearcut	Dec	6	365	10	70	12	1175	1983			LoE3b	BACI	58.8235	0.166742	0.0385952	1300	1400	741.929	397.899	52	52
773.2	Arthur et al. 1998	USA	Kentucky, Robinson forest	clearcut	Dec	1	365	10	70	12	1175	1984			LoE3b	BACI	58.8235	1.46452	0.0396282	1300	4500	717.491	2986.66	64	64
773.2	Arthur et al. 1998	USA	Kentucky, Robinson forest	clearcut	Dec	2	365	10	70	12	1175	1984			LoE3b	BACI	58.8235	1.28768	0.0464332	1500	2700	825.072	1015.21	52	52
773.2	Arthur et al. 1998	USA	Kentucky, Robinson forest	clearcut	Dec	3	365	10	70	12	1175	1984			LoE3b	BACI	58.8235	1.01191	0.0433844	600	1000	345.059	434.576	52	52
773.2	Arthur et al. 1998	USA	Kentucky, Robinson forest	clearcut	Dec	4	365	10	70	12	1175	1984			LoE3b	BACI	58.8235	-0.628574	0.0403611	1400	1000	802.043	393.369	52	52
773.2	Arthur et al. 1998	USA	Kentucky, Robinson forest	clearcut	Dec	5	365	10	70	12	1175	1984			LoE3b	BACI	58.8235	-0.272322	0.0388181	800	700	478.767	191.073	52	52
773.2	Arthur et al. 1998	USA	Kentucky, Robinson forest	clearcut	Dec	6	365	10	70	12	1175	1984			LoE3b	BACI	58.8235	0	0.0384615	1300	1300	741.929	369.478	52	52
861	Swank & Caskey 1982	USA	Coweeta	clearcut	Mix	1	900	59	20	12.6	2100	1977	fertilized and seeds		LoE4b	before-after	28.5714	3.53595	0.12908	20.5731	198.427	2.6681	55.3492	19	79
861	Swank & Caskey 1982	USA	Coweeta	clearcut	Mix	2	900	59	20	12.6	2100	1977	fertilized and seeds		LoE4b	before-after	28.5714	2.34265	0.0911771	20.5731	411.814	2.6681	182.853	19	84
861	Swank & Caskey 1982	USA	Coweeta	clearcut	Mix	3	900	59	20	12.6	2100	1977	fertilized and seeds		LoE4b	before-after	28.5714	4.81178	0.24625	20.5731	418.674	2.6681	96.1542	19	48
865.1	Siemion et al. 2011	USA	Catskill	selective-low	Dec	1	808	17.8	100	5.2	1610	2005			LoE4a	before-after	47.0588	1.3448	0.151742	3210.9	11607	1854.72	7099.74	11	27
865.1	Siemion et al. 2011	USA	Catskill	selective-low	Dec	2	808	17.8	100	5.2	1610	2005			LoE4a	before-after	47.0588	1.14806	0.134266	4473.73	10869.2	3709.7	6142.77	13	25
865.1	Siemion et al. 2011	USA	Catskill	selective-low	Dec	3	808	17.8	100	5.2	1610	2005			LoE4a	before-after	47.0588	0.956971	0.150736	1720.41	4554.6	1347.6	3506.12	12	19
865.2	Siemion et al. 2011	USA	Catskill	selective-low	Dec	1	808	10.1	100	5.2	1610	2005			LoE4a	before-after	47.0588	1.44437	0.138513	3210.9	14067.8	1854.72	8279.79	11	38
865.2	Siemion et al. 2011	USA	Catskill	selective-low	Dec	2	808	10.1	100	5.2	1610	2005			LoE4a	before-after	47.0588	1.23371	0.11917	4473.73	11266.3	3709.7	5879.65	13	37
865.2	Siemion et al. 2011	USA	Catskill	selective-low	Dec	3	808	10.1	100	5.2	1610	2005			LoE4a	before-after	47.0588	1.8421	0.190696	1720.41	5851.86	1347.6	2564.44	12	19
865.3	Siemion et al. 2011	USA	Catskill	patchcut-high	Dec	1	808	33.4	100	5.2	1610	2006			LoE4a	before-after	47.0588	1.42237	0.111716	4473.73	49360.4	3709.7	34608.1	13	52
865.3	Siemion et al. 2011	USA	Catskill	patchcut-high	Dec	2	808	33.4	100	5.2	1610	2006			LoE4a	before-after	47.0588	3.54864	0.271387	1720.41	35284.5	1347.6	10913.7	12	29
865.3	Siemion et al. 2011	USA	Catskill	patchcut-high	Dec	3	808	33.4	100	5.2	1610	2006			LoE4a	before-after	47.0588	2.10261	0.20955	1418.35	15755.8	1160.73	7596.98	9	27
865.4	McHale et al. 2007Burns & Murdoch 2005	USA	Catskill	patchcut-high	Dec	1	798	24	100	4.7	1539	2002	fenced	stem-only	LoE3a	before-after	66.6667	1.50057	0.0713055	2227.83	25281.7	1218.76	17890	24	61
865.4	McHale et al. 2007Burns & Murdoch 2005	USA	Catskill	patchcut-high	Dec	2	798	24	100	4.7	1539	2002	fenced	stem-only	LoE3a	before-after	66.6667	2.94302	0.0974284	1906.49	14628.7	800.761	5136.62	29	63
865.4	McHale et al. 2007Burns & Murdoch 2005	USA	Catskill	patchcut-high	Dec	3	798	24	100	4.7	1539	2002	fenced	stem-only	LoE3a	before-after	66.6667	1.89099	0.0977811	1209.46	6257.05	531.172	3061.87	19	51
865.4	McHale et al. 2007Burns & Murdoch 2005	USA	Catskill	patchcut-high	Dec	4	798	24	100	4.7	1539	2002	fenced	stem-only	LoE3a	before-after	66.6667	0.370871	0.151538	1812.03	2269.33	532.652	1350.99	9	26
865.5	Wang et al. 2006 (fr nr 1760)	USA	Catskill	selective-high	Dec	1	670	10	75	4.6	1530	1984		stem-only	LoE4a	BACI	41.1765	0.972912	0.0641808	802.646	4913.19	482.405	5198.79	27	48
865.5	Wang et al. 2006 (fr nr 1760)	USA	Catskill	selective-high	Dec	2	670	10	75	4.6	1530	1984		stem-only	LoE4a	BACI	41.1765	1.9551	0.12503	465.874	2496.23	387.455	1239.14	18	32
1053	Bäumler & Zech 1999	Germany	Tegernsee	selective-low	Mix	1	1100	4.2	100	6	1988	1997			LoE3b	BACI	56.25	0.497023	0.171813	3429.31	3914.04	828.462	1042.47	12	12
1053	Bäumler & Zech 1999	Germany	Tegernsee	selective-low	Mix	2	1100	4.2	100	6	1988	1997			LoE3b	BACI	56.25	1.39161	0.621036	2368.35	3510.92	604.569	807.305	4	4
1367	Knoepp & Swank 1993	USA	Coweeta	clearcut	Mix	1	765	4	30	12.6	2150	1992	burnt		LoE4b	before-after	35.2941	1.17449	0.453363	27.5824	149.145	7.5222	105.635	3	13
1430	Worrall 2003	USA	Coweeta	clearcut	Dec	1	800	59	50	12.6	2150	1990	fertilized and grass seeds	stem-only	LoE4a	BACI	47.0588	2.26755	0.313332	3.85182	89.8423	3.99267	52.723	11	10
1430	Worrall 2003	USA	Coweeta	clearcut	Dec	2	800	59	50	12.6	2150	1990	fertilized and grass seeds	stem-only	LoE4a	BACI	47.0588	3.14854	0.389748	2.51274	73.5502	1.94489	31.4453	12	11
1616.1	Reynolds et al. 1995	UK	Wales, Beddgelert	patchcut-high	Con	1	335	1.4	40	9.5	2600	1977		mix: stem-only + whole tree	LoE3b	BACI	58.8235	0.293215	0.0315858	3.72	4.47286	2.05313	2.96865	64	64
1616.1	Reynolds et al. 1995	UK	Wales, Beddgelert	patchcut-high	Con	2	335	1.4	40	9.5	2600	1977		mix: stem-only + whole tree	LoE3b	BACI	58.8235	0.951542	0.0428146	3.18857	4.91571	1.75387	1.84832	52	52
1616.1	Reynolds et al. 1995	UK	Wales, Beddgelert	patchcut-high	Con	3	335	1.4	40	9.5	2600	1977		mix: stem-only + whole tree	LoE3b	BACI	58.8235	0.381818	0.0391624	2.92286	3.54286	1.68093	1.53964	52	52
1616.1	Reynolds et al. 1995	UK	Wales, Beddgelert	patchcut-high	Con	4	335	1.4	40	9.5	2600	1977		mix: stem-only + whole tree	LoE3b	BACI	58.8235	-0.354468	0.0390656	2.92286	2.43571	1.67447	0.958133	52	52
1616.1	Reynolds et al. 1995	UK	Wales, Beddgelert	patchcut-high	Con	5	335	1.4	40	9.5	2600	1977		mix: stem-only + whole tree	LoE3b	BACI	58.8235	-0.51947	0.0397589	3.58714	2.74571	2.14676	0.749476	52	52
1616.1	Reynolds et al. 1995	UK	Wales, Beddgelert	patchcut-high	Con	6	335	1.4	40	9.5	2600	1977		mix: stem-only + whole tree	LoE3b	BACI	58.8235	-1.34332	0.0471371	4.11857	1.81571	2.35053	0.51605	52	52
1616.1	Reynolds et al. 1995	UK	Wales, Beddgelert	patchcut-high	Con	7	335	1.4	40	9.5	2600	1977		mix: stem-only + whole tree	LoE3b	BACI	58.8235	-1.48742	0.0490981	4.16286	1.50571	2.47917	0.377424	52	52
1616.2	Reynolds et al. 1995	UK	Wales, Beddgelert	patchcut-low	Con	1	335	6.1	40	9.5	2600	1984		mix: stem-only + whole tree	LoE4a	BACI	47.0588	0.513438	0.027183	3.72	5.18143	2.05313	3.43893	76	76
1616.2	Reynolds et al. 1995	UK	Wales, Beddgelert	patchcut-low	Con	2	335	6.1	40	9.5	2600	1984		mix: stem-only + whole tree	LoE4a	BACI	47.0588	0.409931	0.0392694	3.18857	3.85286	1.75387	1.44869	52	52
1616.2	Reynolds et al. 1995	UK	Wales, Beddgelert	patchcut-low	Con	3	335	6.1	40	9.5	2600	1984		mix: stem-only + whole tree	LoE4a	BACI	47.0588	0.143491	0.0385605	2.92286	3.14429	1.68093	1.36643	52	52
1616.2	Reynolds et al. 1995	UK	Wales, Beddgelert	patchcut-low	Con	4	335	6.1	40	9.5	2600	1984		mix: stem-only + whole tree	LoE4a	BACI	47.0588	-0.0307548	0.0384661	2.92286	2.87857	1.67447	1.13234	52	52
1616.2	Reynolds et al. 1995	UK	Wales, Beddgelert	patchcut-low	Con	5	335	6.1	40	9.5	2600	1984		mix: stem-only + whole tree	LoE4a	BACI	47.0588	0.0262914	0.0384649	3.58714	3.63143	2.14676	0.991242	52	52
1616.2	Reynolds et al. 1995	UK	Wales, Beddgelert	patchcut-low	Con	6	335	6.1	40	9.5	2600	1984		mix: stem-only + whole tree	LoE4a	BACI	47.0588	-0.341019	0.0390206	4.11857	3.49857	2.35053	0.994341	52	52
1616.2	Reynolds et al. 1995	UK	Wales, Beddgelert	patchcut-low	Con	7	335	6.1	40	9.5	2600	1984		mix: stem-only + whole tree	LoE4a	BACI	47.0588	-0.476066	0.0395511	4.16286	3.27714	2.47917	0.821452	52	52
1919	Tokuchi & Fukushima 2009	Japan	Mt.Gomadan Experimental Forest	clearcut	Con	1	1115	10	80	12.3	2521	1992	replanted		LoE4a	before-after	40	3.34451	0.168215	115.809	3359.43	175.999	1653.33	40	20
1919	Tokuchi & Fukushima 2009	Japan	Mt.Gomadan Experimental Forest	clearcut	Con	3	1115	10	80	12.3	2521	1992	replanted		LoE4a	before-after	40	3.9603	0.10285	115.809	3059.9	175.999	894.254	40	80
1919	Tokuchi & Fukushima 2009	Japan	Mt.Gomadan Experimental Forest	clearcut	Con	7	1115	10	80	12.3	2521	1992	replanted		LoE4a	before-after	40	4.15342	0.218758	115.809	1486.24	175.999	510.071	40	20
1919	Tokuchi & Fukushima 2009	Japan	Mt.Gomadan Experimental Forest	clearcut	Con	9	1115	10	80	12.3	2521	1992	replanted		LoE4a	before-after	40	3.15702	0.112293	115.809	1239.22	175.999	466.271	40	40
1919	Tokuchi & Fukushima 2009	Japan	Mt.Gomadan Experimental Forest	clearcut	Con	10	1115	10	80	12.3	2521	1992	replanted		LoE4a	before-after	40	1.09215	0.0849399	115.809	338.409	175.999	244.859	40	20
1919	Tokuchi & Fukushima 2009	Japan	Mt.Gomadan Experimental Forest	clearcut	Con	13	1115	10	80	12.3	2521	1992	replanted		LoE4a	before-after	40	1.97959	0.107656	115.809	580.426	175.999	316.596	40	20
1919	Tokuchi & Fukushima 2009	Japan	Mt.Gomadan Experimental Forest	clearcut	Con	14	1115	10	80	12.3	2521	1992	replanted		LoE4a	before-after	40	0.419967	0.0764698	115.809	211.064	175.999	299.007	40	20
1919	Tokuchi & Fukushima 2009	Japan	Mt.Gomadan Experimental Forest	clearcut	Con	16	1115	10	80	12.3	2521	1992	replanted		LoE4a	before-after	40	1.6456	0.0975667	115.809	606.809	175.999	448.511	40	20
1919	Tokuchi & Fukushima 2009	Japan	Mt.Gomadan Experimental Forest	clearcut	Con	17	1115	10	80	12.3	2521	1992	replanted		LoE4a	before-after	40	2.72899	0.137061	115.809	756.312	175.999	316.596	40	20
1919	Tokuchi & Fukushima 2009	Japan	Mt.Gomadan Experimental Forest	clearcut	Con	18	1115	10	80	12.3	2521	1992	replanted		LoE4a	before-after	40	3.59842	0.130929	115.809	804.681	175.999	202.269	40	40
1919	Tokuchi & Fukushima 2009	Japan	Mt.Gomadan Experimental Forest	clearcut	Con	20	1115	10	80	12.3	2521	1992	replanted		LoE4a	before-after	40	3.10986	0.0635559	115.809	655.177	175.999	171.489	40	120
1919	Tokuchi & Fukushima 2009	Japan	Mt.Gomadan Experimental Forest	clearcut	Con	22	1115	10	80	12.3	2521	1992	replanted		LoE4a	before-after	40	0.0145746	0.0416677	115.809	118.241	175.999	158.246	40	60
1919	Tokuchi & Fukushima 2009	Japan	Mt.Gomadan Experimental Forest	clearcut	Con	24	1115	10	80	12.3	2521	1992	replanted		LoE4a	before-after	40	-0.485853	0.0769671	115.809	27.3228	175.999	187.242	40	20
1919	Tokuchi & Fukushima 2009	Japan	Mt.Gomadan Experimental Forest	clearcut	Con	25	1115	10	80	12.3	2521	1992	replanted		LoE4a	before-after	40	0.212987	0.075378	115.809	152.642	175.999	159.229	40	20
1919	Tokuchi & Fukushima 2009	Japan	Mt.Gomadan Experimental Forest	clearcut	Con	26	1115	10	80	12.3	2521	1992	replanted		LoE4a	before-after	40	0.445942	0.0383286	115.809	192.191	175.999	167.247	40	80
1919	Tokuchi & Fukushima 2009	Japan	Mt.Gomadan Experimental Forest	clearcut	Con	28	1115	10	80	12.3	2521	1992	replanted		LoE4a	before-after	40	0.598193	0.0522365	115.809	215.155	175.999	152.077	40	40
1919	Tokuchi & Fukushima 2009	Japan	Mt.Gomadan Experimental Forest	clearcut	Con	29	1115	10	80	12.3	2521	1992	replanted		LoE4a	before-after	40	0.571687	0.0777236	115.809	228.652	175.999	228.652	40	20
1919	Tokuchi & Fukushima 2009	Japan	Mt.Gomadan Experimental Forest	clearcut	Con	30	1115	10	80	12.3	2521	1992	replanted		LoE4a	before-after	40	0.803132	0.0803752	115.809	263.83	175.999	193.475	40	20
1919	Tokuchi & Fukushima 2009	Japan	Mt.Gomadan Experimental Forest	clearcut	Con	32	1115	10	80	12.3	2521	1992	replanted		LoE4a	before-after	40	0.868498	0.0812857	115.809	281.418	175.999	211.064	40	20
1919	Tokuchi & Fukushima 2009	Japan	Mt.Gomadan Experimental Forest	clearcut	Con	37	1115	10	80	12.3	2521	1992	replanted		LoE4a	before-after	40	1.843	0.0712289	115.809	575.852	175.999	302.072	40	40
1919	Tokuchi & Fukushima 2009	Japan	Mt.Gomadan Experimental Forest	clearcut	Con	38	1115	10	80	12.3	2521	1992	replanted		LoE4a	before-after	40	-0.325421	0.0758825	115.809	64.1813	175.999	106.153	40	20
1919	Tokuchi & Fukushima 2009	Japan	Mt.Gomadan Experimental Forest	clearcut	Con	39	1115	10	80	12.3	2521	1992	replanted		LoE4a	before-after	40	0.128405	0.0751374	115.809	137.899	175.999	156.28	40	20
1919	Tokuchi & Fukushima 2009	Japan	Mt.Gomadan Experimental Forest	clearcut	Con	40	1115	10	80	12.3	2521	1992	replanted		LoE4a	before-after	40	1.33641	0.0611624	115.809	347.376	175.999	167.092	40	40
1934	Herrmann et al. 2001	USA	Pennsylvania, Northern Appalachian project	patchcut-high	Dec	1	600	535	80	10	1573	1992			LoE4a	before-after	42.8571	6.64343	0.795638	1185.18	4314.34	272.892	653.882	20	13
1934	Herrmann et al. 2001	USA	Pennsylvania, Northern Appalachian project	patchcut-high	Dec	2	600	535	80	10	1573	1992			LoE4a	before-after	42.8571	6.94117	0.886144	1185.18	3744.69	272.892	472.983	20	12
1934	Herrmann et al. 2001	USA	Pennsylvania, Northern Appalachian project	patchcut-high	Dec	3	600	535	80	10	1573	1992			LoE4a	before-after	42.8571	4.09963	0.395942	1185.18	3322.85	272.892	758.891	20	12
1934	Herrmann et al. 2001	USA	Pennsylvania, Northern Appalachian project	patchcut-high	Dec	5	600	535	80	10	1573	1992			LoE4a	before-after	42.8571	5.95621	0.64314	1185.18	2565.61	272.892	131.135	20	14
1934	Herrmann et al. 2001	USA	Pennsylvania, Northern Appalachian project	patchcut-high	Dec	6	600	535	80	10	1573	1992			LoE4a	before-after	42.8571	2.79953	0.255792	1185.18	2215.48	272.892	471.533	20	12
1974	Golladay et al. 1992	USA	Coweeta	clearcut	Dec	22	800	16.1	22	12.6	1803	1962			LoE4b	control-impact	29.4118	1.27698	0.240767	13	40	3.162	28.46	10	10
2003.1	Stednick 2008	USA	Alsea	clearcut	Mix	1	89	71	100	10	2334	1966	burnt		LoE4b	BACI	35.2941	-1.06031	0.0389701	4824.01	2679.57	2177.23	1746.46	70	50
2003.1	Stednick 2008	USA	Alsea	clearcut	Mix	2	89	71	100	10	2334	1966	burnt		LoE4b	BACI	35.2941	-1.19448	0.0483696	5148.6	2934	1869.39	1813.82	45	53
2003.1	Stednick 2008	USA	Alsea	clearcut	Mix	3	89	71	100	10	2334	1966	burnt		LoE4b	BACI	35.2941	-1.561	0.102351	5090.95	2229.2	2238.89	1254.59	25	26
2003.2	Stednick 2008	USA	Alsea	patchcut-low	Mix	1	89	303	100	10	2334	1966	burnt		LoE4a	BACI	47.0588	0.006168	0.0370132	4824.01	4837.88	2177.23	2318.94	70	44
2003.2	Stednick 2008	USA	Alsea	patchcut-low	Mix	2	89	303	100	10	2334	1966	burnt		LoE4a	BACI	47.0588	0.0740989	0.0367391	5148.6	5315.71	1869.39	2450.34	45	69
2003.2	Stednick 2008	USA	Alsea	patchcut-low	Mix	3	89	303	100	10	2334	1966	burnt		LoE4a	BACI	47.0588	-0.267521	0.0823969	5090.95	4454.54	2238.89	2442.46	25	24
2102	Rahman et al. 2006	Japan	Kawai Watershed	selective-low	Con	1	690	27.4	40	12	2908	2000		stem-only	LoE3b	before-after	53.3333	-0.0604564	0.0609781	904.148	860.182	765.203	332.019	120	19
2102	Rahman et al. 2006	Japan	Kawai Watershed	selective-low	Con	2	690	27.4	40	12	2908	2000		stem-only	LoE3b	before-after	53.3333	-0.286352	0.0919773	904.148	692.297	765.203	244.209	120	12
2102	Rahman et al. 2006	Japan	Kawai Watershed	selective-low	Con	3	690	27.4	40	12	2908	2000		stem-only	LoE3b	before-after	53.3333	0.47146	0.0646942	904.148	1251.68	765.203	447.696	120	18
2102	Rahman et al. 2006	Japan	Kawai Watershed	selective-low	Con	4	690	27.4	40	12	2908	2000		stem-only	LoE3b	before-after	53.3333	-0.143406	0.108412	904.148	795.703	765.203	543.844	120	10
2102	Rahman et al. 2006	Japan	Kawai Watershed	selective-low	Con	5	690	27.4	40	12	2908	2000		stem-only	LoE3b	before-after	53.3333	0.212279	0.119619	904.148	1063.27	765.203	324.396	120	9
A1.1	Meininger 2011	USA	Hinkle Creek Catchment	patchcut-high	Con	1	765	23	60	8.5	1800	2006	replanted		LoE4b	BACI	35.2941	1.64349	0.203183	65.5735	239.274	26.651	115.892	8	26
A1.1	Meininger 2011	USA	Hinkle Creek Catchment	patchcut-high	Con	2	765	23	60	8.5	1800	2006	replanted		LoE4b	BACI	35.2941	3.4343	0.324526	32.2935	372.864	15.3433	108.525	8	28
A1.1	Meininger 2011	USA	Hinkle Creek Catchment	patchcut-high	Con	3	765	23	60	8.5	1800	2006	replanted		LoE4b	BACI	35.2941	2.02798	0.202402	49.3847	230.423	11.0321	99.2608	9	28
A1.1	Meininger 2011	USA	Hinkle Creek Catchment	patchcut-high	Con	4	765	23	60	8.5	1800	2006	replanted		LoE4b	BACI	35.2941	1.70221	0.175908	28.8611	189.043	12.4669	103.034	9	33
A1.1	Meininger 2011	USA	Hinkle Creek Catchment	patchcut-high	Con	5	765	23	60	8.5	1800	2006	replanted		LoE4b	BACI	35.2941	2.30816	0.179516	26.3005	177.902	15.6055	73.1554	11	34
A1.2	Meininger 2011	USA	Hinkle Creek Catchment	patchcut-low	Con	1	765	65	60	8.5	1800	2006	replanted		LoE4b	BACI	35.2941	1.22462	0.173592	65.5735	136.668	26.651	61.5994	8	33
A1.2	Meininger 2011	USA	Hinkle Creek Catchment	patchcut-low	Con	2	765	65	60	8.5	1800	2006	replanted		LoE4b	BACI	35.2941	2.1107	0.19974	32.2935	220.415	15.3433	95.2924	8	38
A1.2	Meininger 2011	USA	Hinkle Creek Catchment	patchcut-low	Con	3	765	65	60	8.5	1800	2006	replanted		LoE4b	BACI	35.2941	1.38664	0.146742	49.3847	122.376	11.0321	55.783	9	51
A1.2	Meininger 2011	USA	Hinkle Creek Catchment	patchcut-low	Con	4	765	65	60	8.5	1800	2006	replanted		LoE4b	BACI	35.2941	2.03687	0.166271	28.8611	187.551	12.4669	82.764	9	50
A1.2	Meininger 2011	USA	Hinkle Creek Catchment	patchcut-low	Con	5	765	65	60	8.5	1800	2006	replanted		LoE4b	BACI	35.2941	1.65592	0.141665	26.3005	80.3044	15.6055	35.054	11	41
A1.3	Meininger 2011	USA	Hinkle Creek Catchment	patchcut-low	Con	1	765	111	60	8.5	1800	2006	replanted		LoE4b	BACI	35.2941	4.85253	0.242036	24.9381	209.211	9.63579	44.5165	21	47
A1.3	Meininger 2011	USA	Hinkle Creek Catchment	patchcut-low	Con	2	765	111	60	8.5	1800	2006	replanted		LoE4b	BACI	35.2941	3.16394	0.138515	11.8154	277.658	4.92642	104.5	25	42
A1.3	Meininger 2011	USA	Hinkle Creek Catchment	patchcut-low	Con	3	765	111	60	8.5	1800	2006	replanted		LoE4b	BACI	35.2941	3.8668	0.176921	14.4769	208.703	4.1563	67.4463	30	35
A1.3	Meininger 2011	USA	Hinkle Creek Catchment	patchcut-low	Con	4	765	111	60	8.5	1800	2006	replanted		LoE4b	BACI	35.2941	2.31542	0.0690878	38.337	339.984	31.4687	173.959	45	52
A1.3	Meininger 2011	USA	Hinkle Creek Catchment	patchcut-low	Con	5	765	111	60	8.5	1800	2006	replanted		LoE4b	BACI	35.2941	2.605	0.0967326	10.2222	92.7846	3.67348	41.8008	34	43
A1.4	Meininger 2011	USA	Hinkle Creek Catchment	patchcut-low	Con	1	765	95	60	8.5	1800	2006	replanted		LoE4b	BACI	35.2941	3.23653	0.162707	24.9381	56.6134	9.63579	9.66903	21	38
A1.4	Meininger 2011	USA	Hinkle Creek Catchment	patchcut-low	Con	2	765	95	60	8.5	1800	2006	replanted		LoE4b	BACI	35.2941	5.51791	0.32744	11.8154	55.6035	4.92642	9.39494	25	34
A1.4	Meininger 2011	USA	Hinkle Creek Catchment	patchcut-low	Con	3	765	95	60	8.5	1800	2006	replanted		LoE4b	BACI	35.2941	3.24034	0.146968	14.4769	45.0025	4.1563	12.2214	30	33
A1.4	Meininger 2011	USA	Hinkle Creek Catchment	patchcut-low	Con	4	765	95	60	8.5	1800	2006	replanted		LoE4b	BACI	35.2941	1.65613	0.0669307	38.337	95.3451	31.4687	37.1329	45	36
A1.4	Meininger 2011	USA	Hinkle Creek Catchment	patchcut-low	Con	5	765	95	60	8.5	1800	2006	replanted		LoE4b	BACI	35.2941	5.46182	0.291143	10.2222	41.223	3.67348	7.15549	34	31
G1.1	Neal et al. 2011	UK	Plynlimon,Afon Hore	patchcut-high	Con	1	538	335	25	7.2	2500	1988	replanted	stem-only	LoE3b	control-impact	50	2.42879	0.0655615	1000	2687.74	265.482	938.796	53	53
G1.1	Neal et al. 2011	UK	Plynlimon,Afon Hore	patchcut-high	Con	2	538	335	25	7.2	2500	1988	replanted	stem-only	LoE3b	control-impact	50	2.017	0.0548558	958.182	2343.64	481.583	835.833	55	55
G1.1	Neal et al. 2011	UK	Plynlimon,Afon Hore	patchcut-high	Con	3	538	335	25	7.2	2500	1988	replanted	stem-only	LoE3b	control-impact	50	2.05015	0.0635579	876.042	2023.96	388.941	682.454	48	48
G1.1	Neal et al. 2011	UK	Plynlimon,Afon Hore	patchcut-high	Con	4	538	335	25	7.2	2500	1988	replanted	stem-only	LoE3b	control-impact	50	1.03121	0.0435741	1046.15	1655.77	469.234	684.467	52	52
G1.1	Neal et al. 2011	UK	Plynlimon,Afon Hore	patchcut-high	Con	5	538	335	25	7.2	2500	1988	replanted	stem-only	LoE3b	control-impact	50	0.825304	0.0413698	780.392	1040.74	283.386	338.849	51	54
G1.1	Neal et al. 2011	UK	Plynlimon,Afon Hore	patchcut-high	Con	6	538	335	25	7.2	2500	1988	replanted	stem-only	LoE3b	control-impact	50	0.516563	0.039397	665.686	822.222	257.195	336.837	51	54
G1.1	Neal et al. 2011	UK	Plynlimon,Afon Hore	patchcut-high	Con	7	538	335	25	7.2	2500	1988	replanted	stem-only	LoE3b	control-impact	50	0.165466	0.0393499	663.725	697.059	149.692	239.877	51	51
G1.1	Neal et al. 2011	UK	Plynlimon,Afon Hore	patchcut-high	Con	8	538	335	25	7.2	2500	1988	replanted	stem-only	LoE3b	control-impact	50	-0.109557	0.0377925	1131.13	1068.87	572.883	555.413	53	53
G1.1	Neal et al. 2011	UK	Plynlimon,Afon Hore	patchcut-high	Con	9	538	335	25	7.2	2500	1988	replanted	stem-only	LoE3b	control-impact	50	-0.113752	0.0389014	823.077	773.725	442.305	418.363	52	51
G1.1	Neal et al. 2011	UK	Plynlimon,Afon Hore	patchcut-high	Con	10	538	335	25	7.2	2500	1988	replanted	stem-only	LoE3b	control-impact	50	-0.362319	0.0410712	1102.04	933	465.134	460.768	49	50
G1.1	Neal et al. 2011	UK	Plynlimon,Afon Hore	patchcut-high	Con	11	538	335	25	7.2	2500	1988	replanted	stem-only	LoE3b	control-impact	50	-0.803443	0.0445689	944.792	736.735	255.418	258.355	48	49
G1.1	Neal et al. 2011	UK	Plynlimon,Afon Hore	patchcut-high	Con	12	538	335	25	7.2	2500	1988	replanted	stem-only	LoE3b	control-impact	50	-0.583681	0.0425715	571	427.083	265.363	220.965	50	48
G1.1	Neal et al. 2011	UK	Plynlimon,Afon Hore	patchcut-high	Con	13	538	335	25	7.2	2500	1988	replanted	stem-only	LoE3b	control-impact	50	-0.771242	0.055095	767.949	548.718	310.875	248.545	39	39
G1.1	Neal et al. 2011	UK	Plynlimon,Afon Hore	patchcut-high	Con	14	538	335	25	7.2	2500	1988	replanted	stem-only	LoE3b	control-impact	50	-0.865625	0.0441925	902	618.367	365.608	277.769	50	49
G1.1	Neal et al. 2011	UK	Plynlimon,Afon Hore	patchcut-high	Con	15	538	335	25	7.2	2500	1988	replanted	stem-only	LoE3b	control-impact	50	-0.518334	0.0413434	893	648	511.601	422.21	50	50
G1.1	Neal et al. 2011	UK	Plynlimon,Afon Hore	patchcut-high	Con	16	538	335	25	7.2	2500	1988	replanted	stem-only	LoE3b	control-impact	50	-0.707367	0.0408672	654.808	475	271.571	231.47	52	52
G1.1	Neal et al. 2011	UK	Plynlimon,Afon Hore	patchcut-high	Con	17	538	335	25	7.2	2500	1988	replanted	stem-only	LoE3b	control-impact	50	-0.793003	0.042721	782	569.608	286.563	243.737	50	51
G1.1	Neal et al. 2011	UK	Plynlimon,Afon Hore	patchcut-high	Con	18	538	335	25	7.2	2500	1988	replanted	stem-only	LoE3b	control-impact	50	-0.557079	0.0407369	892.157	663.725	433.056	379.088	51	51
G1.1	Neal et al. 2011	UK	Plynlimon,Afon Hore	patchcut-high	Con	19	538	335	25	7.2	2500	1988	replanted	stem-only	LoE3b	control-impact	50	-0.665226	0.0409868	1850.59	1341.34	851.454	653.244	52	51
G1.1	Neal et al. 2011	UK	Plynlimon,Afon Hore	patchcut-high	Con	20	538	335	25	7.2	2500	1988	replanted	stem-only	LoE3b	control-impact	50	-0.7503	0.0423947	2231.48	1616.09	923.615	689.791	50	51
G1.1	Neal et al. 2011	UK	Plynlimon,Afon Hore	patchcut-high	Con	21	538	335	25	7.2	2500	1988	replanted	stem-only	LoE3b	control-impact	50	-0.752817	0.0432705	1931.31	1455.74	699.865	542.193	50	49
G1.1	Neal et al. 2011	UK	Plynlimon,Afon Hore	patchcut-high	Con	22	538	335	25	7.2	2500	1988	replanted	stem-only	LoE3b	control-impact	50	-0.584119	0.0453326	1538.46	1145.27	761.032	558.502	46	46
G1.2	Neal et al. 2011	UK	Plynlimon,Afon Hore	patchcut-high	Con	1	538	167	45	7.2	2500	2006	replanted		LoE3b	before-after	56.25	1.44135	0.0329095	758.076	1345.71	363.667	652.448	291	38
G1.3	Neal et al. 2011	UK	Plynlimon,Tanllwyth	clearcut	Con	1	356	91.6	40	7.2	2500	1996	thinned	stem-only	LoE3a	before-after	62.5	0.53553	0.0241714	2319.25	2770.19	818.097	929.329	226	52
G1.3	Neal et al. 2011	UK	Plynlimon,Tanllwyth	clearcut	Con	2	356	91.6	40	7.2	2500	1996	thinned	stem-only	LoE3a	before-after	62.5	0.427758	0.0243629	2319.25	2691.18	818.097	1059.99	226	51
G1.3	Neal et al. 2011	UK	Plynlimon,Tanllwyth	clearcut	Con	3	356	91.6	40	7.2	2500	1996	thinned	stem-only	LoE3a	before-after	62.5	-0.166444	0.0248833	2319.25	2183.67	818.097	784.511	226	49
G1.3	Neal et al. 2011	UK	Plynlimon,Tanllwyth	clearcut	Con	4	356	91.6	40	7.2	2500	1996	thinned	stem-only	LoE3a	before-after	62.5	-1.09871	0.0270278	2319.25	1455.1	818.097	601.408	226	49
G1.3	Neal et al. 2011	UK	Plynlimon,Tanllwyth	clearcut	Con	5	356	91.6	40	7.2	2500	1996	thinned	stem-only	LoE3a	before-after	62.5	-2.08324	0.0331776	2319.25	733.333	818.097	362.517	226	48
G1.3	Neal et al. 2011	UK	Plynlimon,Tanllwyth	clearcut	Con	6	356	91.6	40	7.2	2500	1996	thinned	stem-only	LoE3a	before-after	62.5	-2.29438	0.0399982	2319.25	553.846	818.097	333.716	226	39
G1.3	Neal et al. 2011	UK	Plynlimon,Tanllwyth	clearcut	Con	7	356	91.6	40	7.2	2500	1996	thinned	stem-only	LoE3a	before-after	62.5	-1.63084	0.029243	2319.25	1002	818.097	744.912	226	50
G1.3	Neal et al. 2011	UK	Plynlimon,Tanllwyth	clearcut	Con	8	356	91.6	40	7.2	2500	1996	thinned	stem-only	LoE3a	before-after	62.5	-1.32371	0.026807	2319.25	1246.15	818.097	764.523	226	52
G1.3	Neal et al. 2011	UK	Plynlimon,Tanllwyth	clearcut	Con	9	356	91.6	40	7.2	2500	1996	thinned	stem-only	LoE3a	before-after	62.5	-2.03807	0.0315303	2319.25	776.471	818.097	350.193	226	51
G1.3	Neal et al. 2011	UK	Plynlimon,Tanllwyth	clearcut	Con	10	356	91.6	40	7.2	2500	1996	thinned	stem-only	LoE3a	before-after	62.5	-2.13935	0.0318873	2319.25	695.192	818.097	386.064	226	52
G1.3	Neal et al. 2011	UK	Plynlimon,Tanllwyth	clearcut	Con	11	356	91.6	40	7.2	2500	1996	thinned	stem-only	LoE3a	before-after	62.5	-2.31163	0.0341052	2319.25	560	818.097	384.389	226	50
G1.3	Neal et al. 2011	UK	Plynlimon,Tanllwyth	clearcut	Con	12	356	91.6	40	7.2	2500	1996	thinned	stem-only	LoE3a	before-after	62.5	-2.30793	0.0340743	2319.25	550.645	818.097	438.793	226	50
G1.3	Neal et al. 2011	UK	Plynlimon,Tanllwyth	clearcut	Con	13	356	91.6	40	7.2	2500	1996	thinned	stem-only	LoE3a	before-after	62.5	-2.22987	0.0334326	2319.25	603.53	818.097	468.084	226	50
G1.3	Neal et al. 2011	UK	Plynlimon,Tanllwyth	clearcut	Con	14	356	91.6	40	7.2	2500	1996	thinned	stem-only	LoE3a	before-after	62.5	-2.05556	0.0329686	2319.25	736.347	818.097	456.973	226	48
G1.3	Neal et al. 2011	UK	Plynlimon,Tanllwyth	clearcut	Con	15	356	91.6	40	7.2	2500	1996	thinned	stem-only	LoE3a	before-after	62.5	-2.33346	0.0462271	2319.25	496.695	818.097	388.036	226	32
G1.4	Neal et al. 2011	UK	Plynlimon,South2Hore	clearcut	Con	1	375	13.7	40	7.2	2500	1989	replanted	stem-only	LoE3a	before-after	62.5	2.21321	0.0527995	1127.94	3570.91	386.564	1584.58	68	55
G1.4	Neal et al. 2011	UK	Plynlimon,South2Hore	clearcut	Con	2	375	13.7	40	7.2	2500	1989	replanted	stem-only	LoE3a	before-after	62.5	4.761	0.133242	1127.94	4014.58	386.564	816.646	68	48
G1.4	Neal et al. 2011	UK	Plynlimon,South2Hore	clearcut	Con	3	375	13.7	40	7.2	2500	1989	replanted	stem-only	LoE3a	before-after	62.5	1.48215	0.0430898	1127.94	2118.27	386.564	907.487	68	52
G1.4	Neal et al. 2011	UK	Plynlimon,South2Hore	clearcut	Con	4	375	13.7	40	7.2	2500	1989	replanted	stem-only	LoE3a	before-after	62.5	0.366417	0.041655	1127.94	1264.47	386.564	337.7	68	38
G1.4	Neal et al. 2011	UK	Plynlimon,South2Hore	clearcut	Con	5	375	13.7	40	7.2	2500	1989	replanted	stem-only	LoE3a	before-after	62.5	-0.753514	0.0379866	1127.94	875	386.564	238.122	68	48
G1.4	Neal et al. 2011	UK	Plynlimon,South2Hore	clearcut	Con	6	375	13.7	40	7.2	2500	1989	replanted	stem-only	LoE3a	before-after	62.5	-0.987111	0.0384078	1127.94	811.765	386.564	191.726	68	51
G1.4	Neal et al. 2011	UK	Plynlimon,South2Hore	clearcut	Con	7	375	13.7	40	7.2	2500	1989	replanted	stem-only	LoE3a	before-after	62.5	0.0956173	0.0336116	1127.94	1172.64	386.564	548.912	68	53
G1.4	Neal et al. 2011	UK	Plynlimon,South2Hore	clearcut	Con	8	375	13.7	40	7.2	2500	1989	replanted	stem-only	LoE3a	before-after	62.5	-0.4155	0.034656	1127.94	971.154	386.564	359.104	68	52
G1.4	Neal et al. 2011	UK	Plynlimon,South2Hore	clearcut	Con	9	375	13.7	40	7.2	2500	1989	replanted	stem-only	LoE3a	before-after	62.5	-0.937577	0.0388707	1127.94	777.551	386.564	348.817	68	49
G1.4	Neal et al. 2011	UK	Plynlimon,South2Hore	clearcut	Con	10	375	13.7	40	7.2	2500	1989	replanted	stem-only	LoE3a	before-after	62.5	-1.21188	0.0413904	1127.94	712.245	386.564	263.891	68	49
G1.4	Neal et al. 2011	UK	Plynlimon,South2Hore	clearcut	Con	11	375	13.7	40	7.2	2500	1989	replanted	stem-only	LoE3a	before-after	62.5	-2.42081	0.0601582	1127.94	357.143	386.564	176.482	68	49
G1.5	Neal et al. 2011	UK	Plynlimon,SouthEast1 and 3	clearcut	Con	1	351	3	40	7.2	2500	1995		stem-only	LoE3a	control-impact	62.5	0.640493	0.0808676	2442.31	3796.15	797.081	2834.25	26	26
G1.5	Neal et al. 2011	UK	Plynlimon,SouthEast1 and 3	clearcut	Con	2	351	3	40	7.2	2500	1995		stem-only	LoE3a	control-impact	62.5	4.80733	0.299139	2488.46	11115.4	766.852	2379.02	26	26
G1.5	Neal et al. 2011	UK	Plynlimon,SouthEast1 and 3	clearcut	Con	3	351	3	40	7.2	2500	1995		stem-only	LoE3a	control-impact	62.5	3.98871	0.249061	2025	12606.2	845.705	3591.85	24	24
G1.5	Neal et al. 2011	UK	Plynlimon,SouthEast1 and 3	clearcut	Con	4	351	3	40	7.2	2500	1995		stem-only	LoE3a	control-impact	62.5	2.93936	0.226152	1176.92	6505.77	200.64	2155.98	13	26
G1.6	Neal et al. 2011	UK	Plynlimon,Tan South and North (=Tan1 and Tan2)	clearcut	Con	1	360	1	40	7.2	2500	1995		stem-only	LoE3a	control-impact	62.5	1.35797	0.0923892	597.561	2689.47	841.052	2424.27	41	19
G1.6	Neal et al. 2011	UK	Plynlimon,Tan South and North (=Tan1 and Tan2)	clearcut	Con	2	360	1	40	7.2	2500	1995		stem-only	LoE3a	control-impact	62.5	2.82834	0.136521	597.561	5221.43	841.052	2530.44	41	21
G1.6	Neal et al. 2011	UK	Plynlimon,Tan South and North (=Tan1 and Tan2)	clearcut	Con	3	360	1	40	7.2	2500	1995		stem-only	LoE3a	control-impact	62.5	1.69121	0.0880584	597.561	2258.33	841.052	1161.21	41	24
G1.6	Neal et al. 2011	UK	Plynlimon,Tan South and North (=Tan1 and Tan2)	clearcut	Con	4	360	1	40	7.2	2500	1995		stem-only	LoE3a	control-impact	62.5	1.21322	0.0815266	597.561	2734.09	841.052	2727.61	41	22
G1.6	Neal et al. 2011	UK	Plynlimon,Tan South and North (=Tan1 and Tan2)	clearcut	Con	5	360	1	40	7.2	2500	1995		stem-only	LoE3a	control-impact	62.5	0.548227	0.0683689	597.561	1016.67	841.052	576.66	41	24
G1.7	Neal et al. 2011	UK	Plynlimon,Lower Hafren	selective-low	Con	1	352	347	40	7.2	2500	1985			LoE3a	before-after	62.5	0.0955666	0.0289654	1393.12	1466.49	835.854	622.238	93	55
G1.7	Neal et al. 2011	UK	Plynlimon,Lower Hafren	selective-low	Con	2	352	347	40	7.2	2500	1985			LoE3a	before-after	62.5	0.183303	0.0284085	1393.12	1543.61	835.854	784.566	93	57
G1.7	Neal et al. 2011	UK	Plynlimon,Lower Hafren	selective-low	Con	3	352	347	40	7.2	2500	1985			LoE3a	before-after	62.5	-0.17435	0.0283979	1393.12	1268.42	835.854	436.364	93	57
G1.7	Neal et al. 2011	UK	Plynlimon,Lower Hafren	selective-low	Con	4	352	347	40	7.2	2500	1985			LoE3a	before-after	62.5	-0.25456	0.0288273	1393.12	1211.61	835.854	419.956	93	56
G1.7	Neal et al. 2011	UK	Plynlimon,Lower Hafren	selective-low	Con	5	352	347	40	7.2	2500	1985			LoE3a	before-after	62.5	-0.395715	0.0305234	1393.12	1113.46	835.854	354.124	93	52
G1.7	Neal et al. 2011	UK	Plynlimon,Lower Hafren	selective-low	Con	6	352	347	40	7.2	2500	1985			LoE3a	before-after	62.5	-0.477926	0.0300481	1393.12	1056.48	835.854	361.345	93	54
G1.7	Neal et al. 2011	UK	Plynlimon,Lower Hafren	selective-low	Con	7	352	347	40	7.2	2500	1985			LoE3a	before-after	62.5	-0.237152	0.0309493	1393.12	1221	835.854	433.435	93	50
G1.7	Neal et al. 2011	UK	Plynlimon,Lower Hafren	selective-low	Con	8	352	347	40	7.2	2500	1985			LoE3a	before-after	62.5	-0.235217	0.0305526	1393.12	1222.55	835.854	438.328	93	51
G1.7	Neal et al. 2011	UK	Plynlimon,Lower Hafren	selective-low	Con	9	352	347	40	7.2	2500	1985			LoE3a	before-after	62.5	-0.437385	0.0295808	1393.12	1092.73	835.854	268.124	93	55
G1.7	Neal et al. 2011	UK	Plynlimon,Lower Hafren	selective-low	Con	10	352	347	40	7.2	2500	1985			LoE3a	before-after	62.5	-0.663442	0.0315012	1393.12	931.731	835.854	285.607	93	52
G1.7	Neal et al. 2011	UK	Plynlimon,Lower Hafren	selective-low	Con	11	352	347	40	7.2	2500	1985			LoE3a	before-after	62.5	-0.489853	0.0308109	1393.12	1032.69	835.854	491.684	93	52
G1.7	Neal et al. 2011	UK	Plynlimon,Lower Hafren	selective-low	Con	12	352	347	40	7.2	2500	1985			LoE3a	before-after	62.5	0.121338	0.029671	1393.12	1490.57	835.854	729.005	93	53
G1.7	Neal et al. 2011	UK	Plynlimon,Lower Hafren	selective-low	Con	13	352	347	40	7.2	2500	1985			LoE3a	before-after	62.5	-0.144548	0.0300555	1393.12	1278.85	835.854	688.231	93	52
G1.7	Neal et al. 2011	UK	Plynlimon,Lower Hafren	selective-low	Con	14	352	347	40	7.2	2500	1985			LoE3a	before-after	62.5	-0.15047	0.0312406	1393.12	1283.67	835.854	432.939	93	49
G1.7	Neal et al. 2011	UK	Plynlimon,Lower Hafren	selective-low	Con	15	352	347	40	7.2	2500	1985			LoE3a	before-after	62.5	-0.20621	0.0309014	1393.12	1246	835.854	370.581	93	50
G1.7	Neal et al. 2011	UK	Plynlimon,Lower Hafren	selective-low	Con	16	352	347	40	7.2	2500	1985			LoE3a	before-after	62.5	-0.541912	0.0326274	1393.12	1009.37	835.854	315.328	93	48
G1.7	Neal et al. 2011	UK	Plynlimon,Lower Hafren	selective-low	Con	17	352	347	40	7.2	2500	1985			LoE3a	before-after	62.5	0.0809343	0.0370935	1393.12	1453.95	835.854	457.576	93	38
G1.7	Neal et al. 2011	UK	Plynlimon,Lower Hafren	selective-low	Con	18	352	347	40	7.2	2500	1985			LoE3a	before-after	62.5	0.224504	0.0305355	1393.12	1561.76	835.854	547.868	93	51
G1.7	Neal et al. 2011	UK	Plynlimon,Lower Hafren	selective-low	Con	19	352	347	40	7.2	2500	1985			LoE3a	before-after	62.5	0.134157	0.0300455	1393.12	1494.23	835.854	561.917	93	52
G1.7	Neal et al. 2011	UK	Plynlimon,Lower Hafren	selective-low	Con	20	352	347	40	7.2	2500	1985			LoE3a	before-after	62.5	-0.441091	0.0310361	1393.12	1078.43	835.854	380.428	93	51
G1.7	Neal et al. 2011	UK	Plynlimon,Lower Hafren	selective-low	Con	21	352	347	40	7.2	2500	1985			LoE3a	before-after	62.5	-0.672779	0.0319322	1393.12	917.647	835.854	343.486	93	51
G1.7	Neal et al. 2011	UK	Plynlimon,Lower Hafren	selective-low	Con	22	352	347	40	7.2	2500	1985			LoE3a	before-after	62.5	-0.817278	0.0330882	1393.12	812	835.854	357.223	93	50
G1.7	Neal et al. 2011	UK	Plynlimon,Lower Hafren	selective-low	Con	23	352	347	40	7.2	2500	1985			LoE3a	before-after	62.5	-1.04181	0.0341292	1393.12	662.019	835.854	313.552	93	51
G1.7	Neal et al. 2011	UK	Plynlimon,Lower Hafren	selective-low	Con	24	352	347	40	7.2	2500	1985			LoE3a	before-after	62.5	-1.09072	0.0344914	1393.12	631.032	835.854	293.721	93	51
G1.7	Neal et al. 2011	UK	Plynlimon,Lower Hafren	selective-low	Con	25	352	347	40	7.2	2500	1985			LoE3a	before-after	62.5	-0.928865	0.0333563	1393.12	737.666	835.854	337.197	93	51
G1.7	Neal et al. 2011	UK	Plynlimon,Lower Hafren	selective-low	Con	26	352	347	40	7.2	2500	1985			LoE3a	before-after	62.5	-0.989718	0.0415472	1393.12	677.456	835.854	227.76	93	37
G2.1	Likens 2012	USA	Hubbard Brook Experimental Forest	selective-high	Mix	1	633	21.9	65	14	1400	1984	none	whole tree	LoE3a	BACI	62.5	1.88838	0.240958	440.083	15248.8	509.912	10695	12	12
G2.1	Likens 2012	USA	Hubbard Brook Experimental Forest	selective-high	Mix	2	633	21.9	65	14	1400	1984	none	whole tree	LoE3a	BACI	62.5	6.02639	0.923279	313.583	15714.3	338.189	3472.8	12	12
G2.1	Likens 2012	USA	Hubbard Brook Experimental Forest	selective-high	Mix	3	633	21.9	65	14	1400	1984	none	whole tree	LoE3a	BACI	62.5	2.00775	0.250647	406.5	3652.75	594.994	2125.89	12	12
G2.1	Likens 2012	USA	Hubbard Brook Experimental Forest	selective-high	Mix	4	633	21.9	65	14	1400	1984	none	whole tree	LoE3a	BACI	62.5	0.181147	0.16735	371	458.083	451.946	475.99	12	12
G2.1	Likens 2012	USA	Hubbard Brook Experimental Forest	selective-high	Mix	5	633	21.9	65	14	1400	1984	none	whole tree	LoE3a	BACI	62.5	-0.872431	0.182524	545.667	113.667	667.102	109.811	12	12
G2.1	Likens 2012	USA	Hubbard Brook Experimental Forest	selective-high	Mix	6	633	21.9	65	14	1400	1984	none	whole tree	LoE3a	BACI	62.5	-1.10263	0.191996	1020.58	49.8333	1201.08	48.3055	12	12
G2.1	Likens 2012	USA	Hubbard Brook Experimental Forest	selective-high	Mix	7	633	21.9	65	14	1400	1984	none	whole tree	LoE3a	BACI	62.5	-1.40947	0.208054	795.167	93	670.218	116.045	12	12
G2.1	Likens 2012	USA	Hubbard Brook Experimental Forest	selective-high	Mix	8	633	21.9	65	14	1400	1984	none	whole tree	LoE3a	BACI	62.5	-1.01121	0.18797	309.083	78.25	299.696	85.5752	12	12
G2.1	Likens 2012	USA	Hubbard Brook Experimental Forest	selective-high	Mix	9	633	21.9	65	14	1400	1984	none	whole tree	LoE3a	BACI	62.5	-0.732431	0.177843	157.583	26.5833	241.288	37.6164	12	12
G2.1	Likens 2012	USA	Hubbard Brook Experimental Forest	selective-high	Mix	10	633	21.9	65	14	1400	1984	none	whole tree	LoE3a	BACI	62.5	-1.1262	0.19309	86.4167	12	90.0489	5.54322	12	12
G2.1	Likens 2012	USA	Hubbard Brook Experimental Forest	selective-high	Mix	11	633	21.9	65	14	1400	1984	none	whole tree	LoE3a	BACI	62.5	-0.96954	0.18625	181	10.3333	240.338	1.1547	12	12
G2.1	Likens 2012	USA	Hubbard Brook Experimental Forest	selective-high	Mix	12	633	21.9	65	14	1400	1984	none	whole tree	LoE3a	BACI	62.5	-0.869767	0.182427	173.25	18.5833	242.423	13.4331	12	12
G2.1	Likens 2012	USA	Hubbard Brook Experimental Forest	selective-high	Mix	13	633	21.9	65	14	1400	1984	none	whole tree	LoE3a	BACI	62.5	-0.71765	0.177396	120.25	46.1667	130.456	53.3579	12	12
G2.1	Likens 2012	USA	Hubbard Brook Experimental Forest	selective-high	Mix	14	633	21.9	65	14	1400	1984	none	whole tree	LoE3a	BACI	62.5	-0.821615	0.18073	142.917	42.1667	159.396	51.2282	12	12
G2.1	Likens 2012	USA	Hubbard Brook Experimental Forest	selective-high	Mix	15	633	21.9	65	14	1400	1984	none	whole tree	LoE3a	BACI	62.5	-1.29425	0.201564	994.833	93.1667	940.845	139.984	12	12
G2.1	Likens 2012	USA	Hubbard Brook Experimental Forest	selective-high	Mix	16	633	21.9	65	14	1400	1984	none	whole tree	LoE3a	BACI	62.5	-1.1867	0.196005	547.583	91.9167	502.793	148.51	12	12
G2.1	Likens 2012	USA	Hubbard Brook Experimental Forest	selective-high	Mix	17	633	21.9	65	14	1400	1984	none	whole tree	LoE3a	BACI	62.5	-0.974439	0.186449	243.667	32.6667	292.915	40.0961	12	12
G2.1	Likens 2012	USA	Hubbard Brook Experimental Forest	selective-high	Mix	18	633	21.9	65	14	1400	1984	none	whole tree	LoE3a	BACI	62.5	-0.94291	0.185189	104.917	25.0833	113.364	22.6293	12	12
G2.1	Likens 2012	USA	Hubbard Brook Experimental Forest	selective-high	Mix	19	633	21.9	65	14	1400	1984	none	whole tree	LoE3a	BACI	62.5	-0.311693	0.168691	79.8333	43.0833	133.284	90.2798	12	12
G2.1	Likens 2012	USA	Hubbard Brook Experimental Forest	selective-high	Mix	20	633	21.9	65	14	1400	1984	none	whole tree	LoE3a	BACI	62.5	-0.461014	0.171094	167.917	87.9167	201.05	125.359	12	12
G2.1	Likens 2012	USA	Hubbard Brook Experimental Forest	selective-high	Mix	21	633	21.9	65	14	1400	1984	none	whole tree	LoE3a	BACI	62.5	-0.746298	0.17827	109.417	32.3333	134.004	43.9387	12	12
G2.1	Likens 2012	USA	Hubbard Brook Experimental Forest	selective-high	Mix	22	633	21.9	65	14	1400	1984	none	whole tree	LoE3a	BACI	62.5	-0.477842	0.171424	85.5833	44.3333	108.75	45.4479	12	12
G2.1	Likens 2012	USA	Hubbard Brook Experimental Forest	selective-high	Mix	23	633	21.9	65	14	1400	1984	none	whole tree	LoE3a	BACI	62.5	-0.436138	0.17063	210.167	106.417	284.164	157.297	12	12
G2.1	Likens 2012	USA	Hubbard Brook Experimental Forest	selective-high	Mix	24	633	21.9	65	14	1400	1984	none	whole tree	LoE3a	BACI	62.5	-0.0364893	0.166694	80.0833	76.3333	99.8357	98.5987	12	12
G2.1	Likens 2012	USA	Hubbard Brook Experimental Forest	selective-high	Mix	25	633	21.9	65	14	1400	1984	none	whole tree	LoE3a	BACI	62.5	-0.0338023	0.16669	56	53.5833	64.4797	73.2871	12	12
G2.1	Likens 2012	USA	Hubbard Brook Experimental Forest	selective-high	Mix	26	633	21.9	65	14	1400	1984	none	whole tree	LoE3a	BACI	62.5	-0.0385111	0.166698	29.6667	27.8333	47.9229	43.9107	12	12
G2.1	Likens 2012	USA	Hubbard Brook Experimental Forest	selective-high	Mix	27	633	21.9	65	14	1400	1984	none	whole tree	LoE3a	BACI	62.5	-0.514068	0.172172	70	22.6667	121.826	31.0347	12	12
G2.1	Likens 2012	USA	Hubbard Brook Experimental Forest	selective-high	Mix	28	633	21.9	65	14	1400	1984	none	whole tree	LoE3a	BACI	62.5	-0.572875	0.173504	133	47.0833	185.427	86.8734	12	12
G2.1	Likens 2012	USA	Hubbard Brook Experimental Forest	selective-high	Mix	29	633	21.9	65	14	1400	1984	none	whole tree	LoE3a	BACI	62.5	-0.646614	0.263066	56.875	19.25	73.67	24.9728	8	8
G2.4	Likens 2012	USA	Hubbard Brook Experimental Forest	patchcut-high	Mix	1	633	12.1	50	14	1400	1970		stem-only	LoE3a	BACI	62.5	0.706757	0.194686	1493.58	4396.99	1317.17	5708.08	12	10
G2.4	Likens 2012	USA	Hubbard Brook Experimental Forest	patchcut-high	Mix	2	633	12.1	50	14	1400	1970		stem-only	LoE3a	BACI	62.5	2.75411	0.375043	1311.67	14768.8	1035.13	7125.59	12	9
G2.4	Likens 2012	USA	Hubbard Brook Experimental Forest	patchcut-high	Mix	3	633	12.1	50	14	1400	1970		stem-only	LoE3a	BACI	62.5	0.953076	0.178423	1612.5	4142.76	903.424	3447.2	12	13
G2.4	Likens 2012	USA	Hubbard Brook Experimental Forest	patchcut-high	Mix	4	633	12.1	50	14	1400	1970		stem-only	LoE3a	BACI	62.5	-0.715864	0.150992	1882	1080.35	1448.28	746.284	12	17
G2.4	Likens 2012	USA	Hubbard Brook Experimental Forest	patchcut-high	Mix	5	633	12.1	50	14	1400	1970		stem-only	LoE3a	BACI	62.5	-1.40636	0.199814	1778.58	335.312	1406.77	270.864	12	13
G2.4	Likens 2012	USA	Hubbard Brook Experimental Forest	patchcut-high	Mix	6	633	12.1	50	14	1400	1970		stem-only	LoE3a	BACI	62.5	-1.44311	0.230664	1860.17	180.718	1499.86	188.459	12	10
G2.4	Likens 2012	USA	Hubbard Brook Experimental Forest	patchcut-high	Mix	7	633	12.1	50	14	1400	1970		stem-only	LoE3a	BACI	62.5	-1.157	0.187029	1434.17	275.23	1377.86	240.525	12	13
G2.4	Likens 2012	USA	Hubbard Brook Experimental Forest	patchcut-high	Mix	8	633	12.1	50	14	1400	1970		stem-only	LoE3a	BACI	62.5	-1.70604	0.227304	773.5	222.73	405.857	171.963	12	12
G2.4	Likens 2012	USA	Hubbard Brook Experimental Forest	patchcut-high	Mix	9	633	12.1	50	14	1400	1970		stem-only	LoE3a	BACI	62.5	-1.03693	0.189067	524.25	127.889	511.786	102.254	12	12
G2.4	Likens 2012	USA	Hubbard Brook Experimental Forest	patchcut-high	Mix	10	633	12.1	50	14	1400	1970		stem-only	LoE3a	BACI	62.5	-0.78382	0.166577	1144.92	551.37	958.383	464.245	12	14
G4.1	Johnson & Fredriksen 2016	USA	Andrews Experimental Forest, Cascade Mountain, Oregon	clearcut	Con	38	762	96	450	9	2300	1964	burnt		LoE3b	control-impact	50	1.24151	0.198778	16.9762	109.238	12.5021	100.692	12	12
G4.1	Johnson & Fredriksen 2016	USA	Andrews Experimental Forest, Cascade Mountain, Oregon	clearcut	Con	39	762	96	450	9	2300	1964	burnt		LoE3b	control-impact	50	2.11416	0.259785	1.10714	98.5357	2.0029	62.8887	12	12
G4.1	Johnson & Fredriksen 2016	USA	Andrews Experimental Forest, Cascade Mountain, Oregon	clearcut	Con	40	762	96	450	9	2300	1964	burnt		LoE3b	control-impact	50	1.13122	0.193326	2.58333	85.9881	3.51169	100.606	12	12
G4.1	Johnson & Fredriksen 2016	USA	Andrews Experimental Forest, Cascade Mountain, Oregon	clearcut	Con	41	762	96	450	9	2300	1964	burnt		LoE3b	control-impact	50	1.44691	0.210283	1.10714	117.357	2.0029	109.679	12	12
G4.1	Johnson & Fredriksen 2016	USA	Andrews Experimental Forest, Cascade Mountain, Oregon	clearcut	Con	42	762	96	450	9	2300	1964	burnt		LoE3b	control-impact	50	1.4624	0.211221	1.10714	154.262	2.0029	142.977	12	12
G4.1	Johnson & Fredriksen 2016	USA	Andrews Experimental Forest, Cascade Mountain, Oregon	clearcut	Con	43	762	96	450	9	2300	1964	burnt		LoE3b	control-impact	50	0.965828	0.1861	20.6667	101.857	63.3465	95.7116	12	12
G4.1	Johnson & Fredriksen 2016	USA	Andrews Experimental Forest, Cascade Mountain, Oregon	clearcut	Con	44	762	96	450	9	2300	1964	burnt		LoE3b	control-impact	50	1.57419	0.218293	1.84524	111.821	2.2804	95.3593	12	12
G4.1	Johnson & Fredriksen 2016	USA	Andrews Experimental Forest, Cascade Mountain, Oregon	clearcut	Con	45	762	96	450	9	2300	1964	burnt		LoE3b	control-impact	50	2.22403	0.269715	0.369048	62	1.27842	37.8142	12	12
G4.1	Johnson & Fredriksen 2016	USA	Andrews Experimental Forest, Cascade Mountain, Oregon	clearcut	Con	46	762	96	450	9	2300	1964	burnt		LoE3b	control-impact	50	1.42659	0.209066	4.79762	91.8929	4.79891	83.2187	12	12
G4.1	Johnson & Fredriksen 2016	USA	Andrews Experimental Forest, Cascade Mountain, Oregon	clearcut	Con	47	762	96	450	9	2300	1964	burnt		LoE3b	control-impact	50	1.93358	0.244557	2.21429	86.3571	2.31275	59.3705	12	12
G4.2	Martin & Harr 1989	USA	Andrews Experimental Forest, Cascade Mountain, Oregon	clearcut	Con	1	995	13	80	6	2300	1974	burnt and replanted		LoE3b	BACI	50	0.504908	0.274633	0.738095	47.8286	1.80796	109.95	6	10
G4.2	Martin & Harr 1989	USA	Andrews Experimental Forest, Cascade Mountain, Oregon	clearcut	Con	2	995	13	80	6	2300	1974	burnt and replanted		LoE3b	BACI	50	1.61802	0.221208	20.6667	134.702	18.4376	94.445	12	12
G4.2	Martin & Harr 1989	USA	Andrews Experimental Forest, Cascade Mountain, Oregon	clearcut	Con	3	995	13	80	6	2300	1974	burnt and replanted		LoE3b	BACI	50	1.49058	0.212955	12.9167	137.286	14.4379	113.002	12	12
G4.2	Martin & Harr 1989	USA	Andrews Experimental Forest, Cascade Mountain, Oregon	clearcut	Con	4	995	13	80	6	2300	1974	burnt and replanted		LoE3b	BACI	50	1.52754	0.215279	8.4881	91.5238	7.42444	73.8471	12	12
G4.2	Martin & Harr 1989	USA	Andrews Experimental Forest, Cascade Mountain, Oregon	clearcut	Con	5	995	13	80	6	2300	1974	burnt and replanted		LoE3b	BACI	50	0.720243	0.177474	26.9405	75.2857	72.5838	55.9538	12	12
G4.2	Martin & Harr 1989	USA	Andrews Experimental Forest, Cascade Mountain, Oregon	clearcut	Con	6	995	13	80	6	2300	1974	burnt and replanted		LoE3b	BACI	50	1.34187	0.204179	7.75	32.1071	7.34395	23.6704	12	12
G4.2	Martin & Harr 1989	USA	Andrews Experimental Forest, Cascade Mountain, Oregon	clearcut	Con	7	995	13	80	6	2300	1974	burnt and replanted		LoE3b	BACI	50	1.13803	0.193648	2.95238	11.8095	2.18048	10.4002	12	12
G4.2	Martin & Harr 1989	USA	Andrews Experimental Forest, Cascade Mountain, Oregon	clearcut	Con	8	995	13	80	6	2300	1974	burnt and replanted		LoE3b	BACI	50	0.20446	0.167538	8.85714	11.4405	11.0109	13.2801	12	12
G4.2	Martin & Harr 1989	USA	Andrews Experimental Forest, Cascade Mountain, Oregon	clearcut	Con	9	995	13	80	6	2300	1974	burnt and replanted		LoE3b	BACI	50	-0.138859	0.167068	20.6667	17.7143	25.1465	14.5047	12	12
G4.2	Martin & Harr 1989	USA	Andrews Experimental Forest, Cascade Mountain, Oregon	clearcut	Con	10	995	13	80	6	2300	1974	burnt and replanted		LoE3b	BACI	50	0.3763	0.169617	35.4286	59.4167	50.6697	70.768	12	12
G4.2	Martin & Harr 1989	USA	Andrews Experimental Forest, Cascade Mountain, Oregon	clearcut	Con	11	995	13	80	6	2300	1974	burnt and replanted		LoE3b	BACI	50	0.778432	0.179291	8.11905	14.3929	7.97441	7.58284	12	12
G4.2	Martin & Harr 1989	USA	Andrews Experimental Forest, Cascade Mountain, Oregon	clearcut	Con	12	995	13	80	6	2300	1974	burnt and replanted		LoE3b	BACI	50	-0.781839	0.179402	82.2976	14.3929	118.206	9.46532	12	12
G4.2	Martin & Harr 1989	USA	Andrews Experimental Forest, Cascade Mountain, Oregon	clearcut	Con	29	995	13	80	6	2300	1974	burnt and replanted		LoE3b	BACI	50	0.362559	0.169405	0.738095	1.47619	1.72382	2.18048	12	12
G4.2	Martin & Harr 1989	USA	Andrews Experimental Forest, Cascade Mountain, Oregon	clearcut	Con	30	995	13	80	6	2300	1974	burnt and replanted		LoE3b	BACI	50	-1.15644	0.194528	5.90476	1.47619	4.75224	2.18048	12	12
G4.2	Martin & Harr 1989	USA	Andrews Experimental Forest, Cascade Mountain, Oregon	clearcut	Con	31	995	13	80	6	2300	1974	burnt and replanted		LoE3b	BACI	50	-1.94162	0.245206	7.75	1.47619	3.83526	2.18048	12	12
G4.2	Martin & Harr 1989	USA	Andrews Experimental Forest, Cascade Mountain, Oregon	clearcut	Con	32	995	13	80	6	2300	1974	burnt and replanted		LoE3b	BACI	50	-0.372229	0.169553	2.21429	1.10714	3.53278	2.0029	12	12
G4.2	Martin & Harr 1989	USA	Andrews Experimental Forest, Cascade Mountain, Oregon	clearcut	Con	33	995	13	80	6	2300	1974	burnt and replanted		LoE3b	BACI	50	-0.624974	0.174804	1.84524	0.369048	2.96076	1.27842	12	12
G4.2	Martin & Harr 1989	USA	Andrews Experimental Forest, Cascade Mountain, Oregon	clearcut	Con	34	995	13	80	6	2300	1974	burnt and replanted		LoE3b	BACI	50	0.272576	0.168215	1.47619	2.21429	2.18048	2.98574	12	12
G4.2	Martin & Harr 1989	USA	Andrews Experimental Forest, Cascade Mountain, Oregon	clearcut	Con	35	995	13	80	6	2300	1974	burnt and replanted		LoE3b	BACI	50	-0.969129	0.186234	4.79762	0.369048	6.1068	1.27842	12	12
G4.2	Martin & Harr 1989	USA	Andrews Experimental Forest, Cascade Mountain, Oregon	clearcut	Con	36	995	13	80	6	2300	1974	burnt and replanted		LoE3b	BACI	50	-0.763026	0.178796	52.7738	3.69048	87.7312	4.15151	12	12
G4.2	Martin & Harr 1989	USA	Andrews Experimental Forest, Cascade Mountain, Oregon	clearcut	Con	37	995	13	80	6	2300	1974	burnt and replanted		LoE3b	BACI	50	0.389259	0.169823	2.58333	4.79762	2.96076	7.18028	12	12
G4.2	Martin & Harr 1989	USA	Andrews Experimental Forest, Cascade Mountain, Oregon	clearcut	Con	38	995	13	80	6	2300	1974	burnt and replanted		LoE3b	BACI	50	-0.0945876	0.166853	2.21429	1.84524	4.42857	2.96076	12	12
G4.2	Martin & Harr 1989	USA	Andrews Experimental Forest, Cascade Mountain, Oregon	clearcut	Con	39	995	13	80	6	2300	1974	burnt and replanted		LoE3b	BACI	50	0.256964	0.201651	0.442857	0.885714	1.40044	1.86725	10	10
G4.3	Martin & Harr 1989	USA	Andrews Experimental Forest, Cascade Mountain, Oregon	selective-high	Con	1	1005	15	80	6	2300	1974	burnt		LoE3b	BACI	50	1.36515	0.301768	2.21429	163.488	3.70521	135.652	6	12
G4.3	Martin & Harr 1989	USA	Andrews Experimental Forest, Cascade Mountain, Oregon	selective-high	Con	2	1005	15	80	6	2300	1974	burnt		LoE3b	BACI	50	0.328631	0.168917	20.2976	31	18.7374	40.3241	12	12
G4.3	Martin & Harr 1989	USA	Andrews Experimental Forest, Cascade Mountain, Oregon	selective-high	Con	3	1005	15	80	6	2300	1974	burnt		LoE3b	BACI	50	0.197702	0.167481	12.5476	16.2381	14.7283	20.8004	12	12
G4.3	Martin & Harr 1989	USA	Andrews Experimental Forest, Cascade Mountain, Oregon	selective-high	Con	4	1005	15	80	6	2300	1974	burnt		LoE3b	BACI	50	0.391002	0.169852	29.8929	69.75	71.81	119.222	12	12
G4.3	Martin & Harr 1989	USA	Andrews Experimental Forest, Cascade Mountain, Oregon	selective-high	Con	5	1005	15	80	6	2300	1974	burnt		LoE3b	BACI	50	1.20883	0.19711	6.27381	14.3929	5.15707	7.58284	12	12
G4.3	Martin & Harr 1989	USA	Andrews Experimental Forest, Cascade Mountain, Oregon	selective-high	Con	6	1005	15	80	6	2300	1974	burnt		LoE3b	BACI	50	-0.103024	0.166888	7.38095	6.64286	7.39436	6.4037	12	12
G4.3	Martin & Harr 1989	USA	Andrews Experimental Forest, Cascade Mountain, Oregon	selective-high	Con	7	1005	15	80	6	2300	1974	burnt		LoE3b	BACI	50	0.551801	0.17301	2.95238	5.53571	2.18048	6.00869	12	12
G4.3	Martin & Harr 1989	USA	Andrews Experimental Forest, Cascade Mountain, Oregon	selective-high	Con	8	1005	15	80	6	2300	1974	burnt		LoE3b	BACI	50	0.466761	0.171206	8.85714	16.6071	11.0109	19.8164	12	12
G4.3	Martin & Harr 1989	USA	Andrews Experimental Forest, Cascade Mountain, Oregon	selective-high	Con	9	1005	15	80	6	2300	1974	burnt		LoE3b	BACI	50	-0.314851	0.168732	36.1667	22.5119	54.4629	23.2396	12	12
G4.4	Johnson & Fredriksen 2016	USA	Andrews Experimental Forest, Cascade Mountain, Oregon	clearcut	Con	1	563	10	450	9	2300	1975			LoE3b	BACI	50	1.64953	0.223353	12.1786	67.1667	6.00869	45.1167	12	12
G4.4	Johnson & Fredriksen 2016	USA	Andrews Experimental Forest, Cascade Mountain, Oregon	clearcut	Con	2	563	10	450	9	2300	1975			LoE3b	BACI	50	2.37318	0.284	8.85714	209.619	10.3429	115.04	12	12
G4.4	Johnson & Fredriksen 2016	USA	Andrews Experimental Forest, Cascade Mountain, Oregon	clearcut	Con	3	563	10	450	9	2300	1975			LoE3b	BACI	50	1.86945	0.239476	6.27381	121.786	6.39209	84.1217	12	12
G4.4	Johnson & Fredriksen 2016	USA	Andrews Experimental Forest, Cascade Mountain, Oregon	clearcut	Con	4	563	10	450	9	2300	1975			LoE3b	BACI	50	1.47887	0.21223	8.85714	100.381	4.9961	84.351	12	12
G4.4	Johnson & Fredriksen 2016	USA	Andrews Experimental Forest, Cascade Mountain, Oregon	clearcut	Con	5	563	10	450	9	2300	1975			LoE3b	BACI	50	1.19133	0.196235	6.64286	30.631	5.17146	27.0013	12	12
G4.4	Johnson & Fredriksen 2016	USA	Andrews Experimental Forest, Cascade Mountain, Oregon	clearcut	Con	6	563	10	450	9	2300	1975			LoE3b	BACI	50	0.158665	0.167191	17.7143	21.4048	29.5573	11.615	12	12
G4.4	Johnson & Fredriksen 2016	USA	Andrews Experimental Forest, Cascade Mountain, Oregon	clearcut	Con	7	563	10	450	9	2300	1975			LoE3b	BACI	50	0.256222	0.168034	13.6548	18.4524	21.2352	14.2359	12	12
G4.4	Johnson & Fredriksen 2016	USA	Andrews Experimental Forest, Cascade Mountain, Oregon	clearcut	Con	8	563	10	450	9	2300	1975			LoE3b	BACI	50	0.250698	0.167976	14.3929	19.1905	18.9894	17.9476	12	12
G4.4	Johnson & Fredriksen 2016	USA	Andrews Experimental Forest, Cascade Mountain, Oregon	clearcut	Con	9	563	10	450	9	2300	1975			LoE3b	BACI	50	-0.0449404	0.166709	18.0833	16.9762	32.2934	9.41022	12	12
G4.4	Johnson & Fredriksen 2016	USA	Andrews Experimental Forest, Cascade Mountain, Oregon	clearcut	Con	10	563	10	450	9	2300	1975			LoE3b	BACI	50	-0.608323	0.174376	38.381	16.2381	47.1457	15.7236	12	12
G4.4	Johnson & Fredriksen 2016	USA	Andrews Experimental Forest, Cascade Mountain, Oregon	clearcut	Con	11	563	10	450	9	2300	1975			LoE3b	BACI	50	-1.28993	0.201331	37.6429	15.869	18.9306	13.1452	12	12
G4.4	Johnson & Fredriksen 2016	USA	Andrews Experimental Forest, Cascade Mountain, Oregon	clearcut	Con	12	563	10	450	9	2300	1975			LoE3b	BACI	50	-1.31104	0.202475	69.0119	15.5	54.188	13.0145	12	12
G4.4	Johnson & Fredriksen 2016	USA	Andrews Experimental Forest, Cascade Mountain, Oregon	clearcut	Con	13	563	10	450	9	2300	1975			LoE3b	BACI	50	0.232725	0.167795	15.131	20.6667	17.4566	27.3865	12	12
G4.4	Johnson & Fredriksen 2016	USA	Andrews Experimental Forest, Cascade Mountain, Oregon	clearcut	Con	14	563	10	450	9	2300	1975			LoE3b	BACI	50	0.76521	0.178866	3.69048	8.85714	2.55684	8.85714	12	12
G4.4	Johnson & Fredriksen 2016	USA	Andrews Experimental Forest, Cascade Mountain, Oregon	clearcut	Con	15	563	10	450	9	2300	1975			LoE3b	BACI	50	0.319311	0.168791	8.85714	10.7024	5.66505	5.49193	12	12
G4.4	Johnson & Fredriksen 2016	USA	Andrews Experimental Forest, Cascade Mountain, Oregon	clearcut	Con	16	563	10	450	9	2300	1975			LoE3b	BACI	50	-0.172392	0.167286	5.53571	4.79762	5.04051	2.96076	12	12
G4.4	Johnson & Fredriksen 2016	USA	Andrews Experimental Forest, Cascade Mountain, Oregon	clearcut	Con	17	563	10	450	9	2300	1975			LoE3b	BACI	50	0.624974	0.174804	2.58333	4.05952	2.2804	2.2804	12	12
G4.4	Johnson & Fredriksen 2016	USA	Andrews Experimental Forest, Cascade Mountain, Oregon	clearcut	Con	18	563	10	450	9	2300	1975			LoE3b	BACI	50	-0.365698	0.169453	2.95238	1.84524	3.44764	2.2804	12	12
G4.4	Johnson & Fredriksen 2016	USA	Andrews Experimental Forest, Cascade Mountain, Oregon	clearcut	Con	19	563	10	450	9	2300	1975			LoE3b	BACI	50	-0.242746	0.167894	4.42857	3.69048	2.67053	3.17857	12	12
G4.4	Johnson & Fredriksen 2016	USA	Andrews Experimental Forest, Cascade Mountain, Oregon	clearcut	Con	20	563	10	450	9	2300	1975			LoE3b	BACI	50	-0.369816	0.169516	12.1786	5.90476	22.5122	5.45119	12	12
G4.4	Johnson & Fredriksen 2016	USA	Andrews Experimental Forest, Cascade Mountain, Oregon	clearcut	Con	21	563	10	450	9	2300	1975			LoE3b	BACI	50	0.87367	0.182569	4.79762	11.0714	3.51169	9.15411	12	12
G4.4	Johnson & Fredriksen 2016	USA	Andrews Experimental Forest, Cascade Mountain, Oregon	clearcut	Con	22	563	10	450	9	2300	1975			LoE3b	BACI	50	0.950582	0.185492	4.42857	34.6905	2.67053	43.3841	12	12
G4.4	Johnson & Fredriksen 2016	USA	Andrews Experimental Forest, Cascade Mountain, Oregon	clearcut	Con	23	563	10	450	9	2300	1975			LoE3b	BACI	50	1.18376	0.19586	3.69048	23.619	2.55684	22.843	12	12
G4.4	Johnson & Fredriksen 2016	USA	Andrews Experimental Forest, Cascade Mountain, Oregon	clearcut	Con	24	563	10	450	9	2300	1975			LoE3b	BACI	50	0.872034	0.182509	1.84524	9.59524	2.2804	11.9181	12	12
G4.4	Johnson & Fredriksen 2016	USA	Andrews Experimental Forest, Cascade Mountain, Oregon	clearcut	Con	25	563	10	450	9	2300	1975			LoE3b	BACI	50	0.941111	0.185119	2.58333	28.4167	2.96076	37.3616	12	12
G4.4	Johnson & Fredriksen 2016	USA	Andrews Experimental Forest, Cascade Mountain, Oregon	clearcut	Con	26	563	10	450	9	2300	1975			LoE3b	BACI	50	0.823667	0.180801	3.69048	15.869	3.69718	19.8464	12	12
G4.4	Johnson & Fredriksen 2016	USA	Andrews Experimental Forest, Cascade Mountain, Oregon	clearcut	Con	27	563	10	450	9	2300	1975			LoE3b	BACI	50	0.612753	0.174489	1.84524	8.85714	2.2804	15.4568	12	12
G4.4	Johnson & Fredriksen 2016	USA	Andrews Experimental Forest, Cascade Mountain, Oregon	clearcut	Con	28	563	10	450	9	2300	1975			LoE3b	BACI	50	0.883907	0.182944	0.738095	9.96429	1.72382	14.1469	12	12
G4.4	Johnson & Fredriksen 2016	USA	Andrews Experimental Forest, Cascade Mountain, Oregon	clearcut	Con	29	563	10	450	9	2300	1975			LoE3b	BACI	50	0.415989	0.170272	3.32143	4.79762	3.33816	3.51169	12	12
G4.4	Johnson & Fredriksen 2016	USA	Andrews Experimental Forest, Cascade Mountain, Oregon	clearcut	Con	30	563	10	450	9	2300	1975			LoE3b	BACI	50	0.670593	0.176035	3.32143	5.16667	2.75272	2.55684	12	12
G4.4	Johnson & Fredriksen 2016	USA	Andrews Experimental Forest, Cascade Mountain, Oregon	clearcut	Con	31	563	10	450	9	2300	1975			LoE3b	BACI	50	0.7704	0.179032	2.21429	15.131	2.31275	22.7746	12	12
G4.4	Johnson & Fredriksen 2016	USA	Andrews Experimental Forest, Cascade Mountain, Oregon	clearcut	Con	32	563	10	450	9	2300	1975			LoE3b	BACI	50	0.51262	0.172141	1.47619	6.27381	2.18048	12.591	12	12
G4.4	Johnson & Fredriksen 2016	USA	Andrews Experimental Forest, Cascade Mountain, Oregon	clearcut	Con	33	563	10	450	9	2300	1975			LoE3b	BACI	50	0.990868	0.187121	2.21429	8.4881	2.31275	8.32981	12	12
G4.4	Johnson & Fredriksen 2016	USA	Andrews Experimental Forest, Cascade Mountain, Oregon	clearcut	Con	34	563	10	450	9	2300	1975			LoE3b	BACI	50	0.472938	0.171326	2.21429	4.05952	2.98574	4.41176	12	12
G4.4	Johnson & Fredriksen 2016	USA	Andrews Experimental Forest, Cascade Mountain, Oregon	clearcut	Con	35	563	10	450	9	2300	1975			LoE3b	BACI	50	-0.364315	0.169432	2.58333	1.10714	5.15707	2.0029	12	12
G4.4	Johnson & Fredriksen 2016	USA	Andrews Experimental Forest, Cascade Mountain, Oregon	clearcut	Con	36	563	10	450	9	2300	1975			LoE3b	BACI	50	-0.164045	0.167227	4.05952	3.32143	3.51169	5.04051	12	12
G4.4	Johnson & Fredriksen 2016	USA	Andrews Experimental Forest, Cascade Mountain, Oregon	clearcut	Con	37	563	10	450	9	2300	1975			LoE3b	BACI	50	0	0.166667	4.05952	4.05952	4.41176	4.79891	12	12
G4.4	Johnson & Fredriksen 2016	USA	Andrews Experimental Forest, Cascade Mountain, Oregon	clearcut	Con	38	563	10	450	9	2300	1975			LoE3b	BACI	50	0.406295	0.204127	0.885714	1.77143	1.86725	2.2869	10	10

## Sheet: References
References
Arthur Ma, Coltharp GB, and Brown DL. 1998. Effects of best management practices on forest streamwater quality in eastern Kentucky. Journal of the American Water Resources Association 34: 481–495.
Ba ̈umler R and Zech W. 1999. Effects of forest thinning on the streamwater chemistry of two forest watersheds in the Bavarian Alps. Forest Ecology and Management 116: 119–128.
Burns Da and Murdoch PS. 2005. Effects of a clearcut on the net rates of nitrification and N mineralization in a northern hardwood forest, Catskill Mountains, New York, USA. Biogeochemistry 72: 123–146.
Clinton BD. 2011. Stream water responses to timber harvest: Riparian buffer width effectiveness. Forest Ecology and Management 261: 979–988.
Cummins T and Farrell EP. 2003. Biogeochemical impacts of clearfelling and reforestation on blanket-peatland streams II. Major ions and dissolved organic carbon. Forest Ecology and Management 180: 557–570.
Fukuzawa K, Shibata H, Takagi K, et al. 2006. Effects of clear-cutting on nitrogen leaching and fine root dy- namics in a cool-temperate forested watershed in northern Japan. Forest Ecology and Management 225: 257–261.
Golladay SW, Webster JR, Benfield EF, and Swank WT. 1992. Changes in stream stability following forest clearing as indicated by storm nutrient budgets. Archiv fu ̈r Hydrobiologie 1: 1–33.
Graynoth E. 1979. Effects of logging on stream environments and faunas in Nelson. New Zealand Journal of Marine and Freshwater Research 13: 79–109.
Herrmann M, Sharpe WE, DeWalle DR, and Swistock BR. 2001. Nitrogen export from a watershed subjected to partial salvage logging. TheScientificWorld 1(S2): 440–448.
Johnson S and Fredriksen R. 2016. Stream chemistry concentrations and fluxes using proportional sampling in the Andrews Experimental Forest, 1968 to present. Long-Term Ecological Research. Forest Science Data Bank, Corvallis, OR.
Knoepp JD and Swank WT. 1993. Site preparation burning to improve southern Appalachian pine-hardwood stands: nitrogen responses in soil, soil water, and streams. Canadian Journal of Forest Research 23: 2263–2270.
Likens GE. 2012. Chemistry of streamwater at the Hubbard Brook Experimental Forest, watershed 6, 1963 - present. Durham, NH. Hubbard Brook Data Archive.
Martin CW and Harr RD. 1989. Logging of mature Douglas-fir in western Oregon has little effect on nutrient output budgets. Canadian Journal of Forest Research 19: 35–43.
McHale MR, Burns Da, Lawrence GB, and Murdoch PS. 2007. Factors controlling soil water and stream water aluminum concentrations after a clearcut in a forested watershed with calcium-poor soils. Biogeochemistry 84: 311–331.
Meininger WS. 2011. The influence of contemporary forest management on stream nutrient concentrations in an industrialized forest in the Oregon Cascades. Ph.D. thesis.
1
Murray G, Edmonds R, and Marra J. 2000. Influence of partial harvesting on stream temperatures, chemistry, and turbidity in forests on the western Olympic Peninsula, Washington. Northwest Science 74: 151–164.
Neal C, Reynolds B, Norris D, et al. 2011. Three decades of water quality measurements from the Upper Severn experimental catchments at Plynlimon, Wales: an openly accessible data resource for research, modelling, environmental management and education. Hydrological Processes 25: 3818–3830.
Oda T, Ohte N, and Suzuki M. 2011. Importance of frequent storm flow data for evaluating changes in stream water chemistry following clear-cutting in Japanese headwater catchments. Forest Ecology and Management 262: 1305–1317.
Rahman AFA, Hiura H, and Shino K. 2006. Trends of bulk precipitation and streamwater chemistry in a small mountainous watershed on the Shikoku Island of Japan. Water, Air, and Soil Pollution 175: 257–273.
Reynolds B, Stevens Pa, Adamson JK, et al. 1992. Effects of clearfelling on stream and soil water aluminium chemistry in three UK forests. Environmental Pollution 77: 157–165.
Reynolds B, Stevens PA, Hughes S, et al. 1995. Stream chemistry impacts of conifer harvesting in welsh catch- ments. Water, Air, and Soil Pollution 79: 147–170.
Siemion J, Burns Da, Murdoch PS, and Germain RH. 2011. The relation of harvesting intensity to changes in soil, soil water, and stream chemistry in a northern hardwood forest, Catskill Mountains, USA. Forest Ecology and Management 261: 1510–1519.
Silsbee DG and Larson GL. 1983. A comparison of streams in logged and unlogged areas of Great Smoky Mountains National Park. Hydrobiologia 102: 99–111.
Stednick JD. 2008. Long-term Water Quality Changes Following Timber Harvesting. In: Stednick JD (Ed.) Hydrological and Biological Responses to Forest Practices, chapter 10, 139–155. Springer.
Swank WT and Caskey WH. 1982. Nitrate depletion in a second-order mountain stream. Journal of Environ- mental Quality 11: 581–584.
Tokuchi N and Fukushima K. 2009. Long-term influence of stream water chemistry in Japanese cedar plantation after clear-cutting using the forest rotation in central Japan. Forest Ecology and Management 257: 1768–1775.
Wang X, Burns Da, Yanai RD, et al. 2006. Changes in stream chemistry and nutrient export following a partial harvest in the Catskill Mountains, New York, USA. Forest Ecology and Management 223: 103–112.
Worrall F. 2003. Changes in stream nitrate concentrations due to land management practices, ecological suc- cession, and climate: Developing a systems approach to integrated catchment response. Water Resources Research 39: 1–14.
